# Supplementary material for: Quantifying the symmetry preferences of intermolecular interactions in organic crystal structures
Source: Royal Society of Chemistry journal article supplement (doi:10.1039/c5ce00035a), 2015-01-01
Supplement: c5ce00035a1.csv [file c5ce00035a1.csv]

base type	partner type	Ninteractions	%T	%I	%G	%S	%R	se(%T)	se(%I)	se(%G)	se(%S)	se(%R)
Br[C]	Br[C]	1055	18.6	36.1	13.1	30.0	2.2	1.2	1.5	1.0	1.4	0.4
Br[C]	C[unsat]	653	17.6	23.7	19.9	38.0	0.8	1.5	1.7	1.6	1.9	0.3
Br[C]	H[C]	4462	27.3	20.6	14.7	36.8	0.5	0.7	0.6	0.5	0.7	0.1
C[C6H5]	Br[C]	701	23.0	25.1	12.6	38.7	0.7	1.6	1.6	1.3	1.8	0.3
C[C6H5]	C[C6H5]	16801	23.4	44.3	9.9	20.2	2.2	0.3	0.4	0.2	0.3	0.1
C[C6H5]	C[carbonyl]	1643	23.0	28.4	16.4	30.8	1.3	1.0	1.1	0.9	1.1	0.3
C[C6H5]	C[methyl]	2576	28.8	20.3	12.8	37.3	0.9	0.9	0.8	0.7	1.0	0.2
C[C6H5]	C[sat]	1112	27.8	23.6	12.0	36.2	0.5	1.3	1.3	1.0	1.4	0.2
C[C6H5]	C[unsat]	9354	23.7	32.6	16.5	26.3	0.8	0.4	0.5	0.4	0.5	0.1
C[C6H5]	Cl[C]	1051	26.3	27.3	15.9	30.2	0.4	1.4	1.4	1.1	1.4	0.2
C[C6H5]	H[C]	146694	24.1	22.0	14.4	38.8	0.8	0.1	0.1	0.1	0.1	0.0
C[C6H5]	H[polar]	1379	21.0	31.8	14.9	30.5	1.8	1.1	1.3	1.0	1.2	0.4
C[C6H5]	N[acc]	673	25.7	30.3	18.1	25.3	0.6	1.7	1.8	1.5	1.7	0.3
C[C6H5]	O[=X]	831	26.2	23.6	16.7	33.0	0.5	1.5	1.5	1.3	1.6	0.2
C[C6H5]	O[carbonyl]	1980	24.8	24.3	16.0	33.8	1.0	1.0	1.0	0.8	1.1	0.2
C[carbonyl]	Br[C]	758	22.4	22.3	10.8	43.9	0.5	1.5	1.5	1.1	1.8	0.3
C[carbonyl]	C[C6H5]	2696	24.1	26.1	15.0	33.9	0.9	0.8	0.8	0.7	0.9	0.2
C[carbonyl]	C[carbonyl]	2456	11.8	61.2	6.1	13.1	7.8	0.7	1.0	0.5	0.7	0.5
C[carbonyl]	C[methyl]	2135	28.3	19.5	10.5	41.1	0.6	1.0	0.9	0.7	1.1	0.2
C[carbonyl]	C[sat]	781	25.2	20.5	12.0	41.6	0.6	1.6	1.4	1.2	1.8	0.3
C[carbonyl]	C[unsat]	12462	22.5	45.4	13.6	17.2	1.4	0.4	0.4	0.3	0.3	0.1
C[carbonyl]	Cl[C]	1174	24.4	32.6	15.4	26.7	0.8	1.3	1.4	1.1	1.3	0.3
C[carbonyl]	H[C]	40820	24.8	21.5	13.0	39.9	0.9	0.2	0.2	0.2	0.2	0.0
C[carbonyl]	N[acc]	1065	22.8	31.4	17.3	27.0	1.5	1.3	1.4	1.2	1.4	0.4
C[carbonyl]	O[=X]	1801	25.7	27.2	14.9	31.6	0.6	1.0	1.0	0.8	1.1	0.2
C[carbonyl]	O[carbonyl]	10207	17.0	31.5	12.0	38.3	1.2	0.4	0.5	0.3	0.5	0.1
C[carbonyl]	O[ether]	616	29.1	15.4	10.6	43.5	1.5	1.8	1.5	1.2	2.0	0.5
C[carbonyl]	O[hydroxyl]	918	26.7	21.9	12.0	38.6	0.9	1.5	1.4	1.1	1.6	0.3
C[carbonyl]	O[conj]	1574	18.1	30.2	11.2	38.9	1.5	1.0	1.2	0.8	1.2	0.3
C[methyl]	Br[C]	983	30.4	15.2	14.4	39.1	0.9	1.5	1.1	1.1	1.6	0.3
C[methyl]	C[C6H5]	4316	27.2	19.1	13.3	39.4	0.9	0.7	0.6	0.5	0.7	0.1
C[methyl]	C[carbonyl]	2024	26.3	22.9	11.2	38.7	0.9	1.0	0.9	0.7	1.1	0.2
C[methyl]	C[methyl]	9369	21.7	33.8	10.8	29.8	3.8	0.4	0.5	0.3	0.5	0.2
C[methyl]	C[sat]	1788	31.8	11.8	9.8	46.2	0.3	1.1	0.8	0.7	1.2	0.1
C[methyl]	C[unsat]	16782	23.0	28.6	15.9	31.7	0.8	0.3	0.3	0.3	0.4	0.1
C[methyl]	Cl[C]	1703	28.0	22.4	18.0	31.3	0.3	1.1	1.0	0.9	1.1	0.1
C[methyl]	F[CF3]	728	24.6	23.2	18.8	33.1	0.3	1.6	1.6	1.4	1.7	0.2
C[methyl]	F[CnotCF3]	582	32.3	23.0	15.8	28.2	0.7	1.9	1.7	1.5	1.9	0.3
C[methyl]	H[C]	109548	27.2	20.9	13.0	38.0	0.9	0.1	0.1	0.1	0.1	0.0
C[methyl]	H[polar]	1428	24.8	18.1	13.7	42.3	1.1	1.1	1.0	0.9	1.3	0.3
C[methyl]	N[acc]	1733	25.7	25.9	17.2	30.1	1.0	1.1	1.1	0.9	1.1	0.2
C[methyl]	O[=X]	3260	26.6	22.9	16.9	33.2	0.4	0.8	0.7	0.7	0.8	0.1
C[methyl]	O[anisole]	1124	21.4	26.6	17.0	34.0	1.1	1.2	1.3	1.1	1.4	0.3
C[methyl]	O[carbonyl]	8257	26.6	18.9	13.2	40.7	0.6	0.5	0.4	0.4	0.5	0.1
C[methyl]	O[ether]	911	31.3	9.8	7.1	50.7	1.1	1.5	1.0	0.9	1.7	0.3
C[methyl]	O[hydroxyl]	1124	30.8	15.4	12.5	40.7	0.7	1.4	1.1	1.0	1.5	0.3
C[methyl]	O[conj]	1801	28.5	20.4	10.9	39.6	0.6	1.1	1.0	0.7	1.2	0.2
C[sat]	Br[C]	2402	25.4	19.4	14.7	40.1	0.4	0.9	0.8	0.7	1.0	0.1
C[sat]	C[C6H5]	9320	25.9	22.1	11.8	39.3	0.9	0.5	0.4	0.3	0.5	0.1
C[sat]	C[carbonyl]	3089	21.7	28.0	11.4	37.8	1.2	0.7	0.8	0.6	0.9	0.2
C[sat]	C[methyl]	7476	30.6	14.0	9.9	45.0	0.5	0.5	0.4	0.3	0.6	0.1
C[sat]	C[sat]	7924	24.3	32.3	9.9	30.3	3.3	0.5	0.5	0.3	0.5	0.2
C[sat]	C[unsat]	27765	23.4	31.1	13.8	30.7	1.0	0.3	0.3	0.2	0.3	0.1
C[sat]	Cl[C]	3396	25.6	25.1	16.4	32.2	0.7	0.7	0.7	0.6	0.8	0.1
C[sat]	F[CF3]	1593	23.7	30.2	18.0	26.7	1.4	1.1	1.2	1.0	1.1	0.3
C[sat]	F[CnotCF3]	1299	26.7	29.3	16.8	26.8	0.4	1.2	1.3	1.0	1.2	0.2
C[sat]	H[C]	163910	27.6	20.7	12.0	38.9	0.9	0.1	0.1	0.1	0.1	0.0
C[sat]	H[polar]	3465	27.1	14.6	10.4	46.9	1.0	0.8	0.6	0.5	0.8	0.2
C[sat]	N[acc]	4086	24.4	27.0	16.7	30.8	1.0	0.7	0.7	0.6	0.7	0.2
C[sat]	N[planar]	915	23.5	32.0	12.8	30.2	1.5	1.4	1.5	1.1	1.5	0.4
C[sat]	O[=X]	6597	26.4	22.1	15.4	35.5	0.6	0.5	0.5	0.4	0.6	0.1
C[sat]	O[anisole]	1385	23.7	28.7	13.8	32.8	1.1	1.1	1.2	0.9	1.3	0.3
C[sat]	O[carbonyl]	19151	26.0	18.0	11.9	43.4	0.8	0.3	0.3	0.2	0.4	0.1
C[sat]	O[ether]	3200	27.7	15.3	10.3	45.6	1.1	0.8	0.6	0.5	0.9	0.2
C[sat]	O[hydroxyl]	3687	31.1	11.3	9.0	48.0	0.7	0.8	0.5	0.5	0.8	0.1
C[sat]	O[conj]	3040	24.3	20.2	10.7	43.6	1.2	0.8	0.7	0.6	0.9	0.2
C[sat]	S[=C]	648	26.1	26.9	16.2	29.9	0.9	1.7	1.7	1.4	1.8	0.4
C[sat]	S[thioether]	645	25.1	25.1	16.3	32.6	0.9	1.7	1.7	1.5	1.8	0.4
C[unsat]	Br[C]	5457	23.8	26.6	16.0	32.7	0.8	0.6	0.6	0.5	0.6	0.1
C[unsat]	C[C6H5]	11110	24.5	31.4	15.3	28.1	0.8	0.4	0.4	0.3	0.4	0.1
C[unsat]	C[carbonyl]	11868	21.2	51.4	12.8	13.0	1.6	0.4	0.5	0.3	0.3	0.1
C[unsat]	C[methyl]	11551	24.6	28.4	15.7	30.6	0.8	0.4	0.4	0.3	0.4	0.1
C[unsat]	C[sat]	4088	23.9	30.7	14.4	29.8	1.1	0.7	0.7	0.5	0.7	0.2
C[unsat]	C[unsat]	161188	21.5	51.6	12.5	12.6	1.9	0.1	0.1	0.1	0.1	0.0
C[unsat]	Cl[C]	9286	21.4	37.0	17.8	22.9	0.9	0.4	0.5	0.4	0.4	0.1
C[unsat]	F[CF3]	2813	25.0	33.4	18.4	22.7	0.6	0.8	0.9	0.7	0.8	0.1
C[unsat]	F[CnotCF3]	4699	24.6	31.5	19.5	23.6	0.8	0.6	0.7	0.6	0.6	0.1
C[unsat]	H[C]	437205	21.6	27.7	17.4	32.6	0.8	0.1	0.1	0.1	0.1	0.0
C[unsat]	H[polar]	5786	16.1	26.7	20.6	35.6	1.0	0.5	0.6	0.5	0.6	0.1
C[unsat]	I[C]	1053	25.4	30.2	16.1	27.7	0.6	1.3	1.4	1.1	1.4	0.2
C[unsat]	N[acc]	8311	19.6	39.0	18.4	21.5	1.4	0.4	0.5	0.4	0.5	0.1
C[unsat]	N[planar]	3370	23.3	48.5	14.8	12.5	0.9	0.7	0.9	0.6	0.6	0.2
C[unsat]	O[=X]	12777	24.9	32.4	17.2	24.9	0.7	0.4	0.4	0.3	0.4	0.1
C[unsat]	O[anisole]	1967	20.8	32.8	17.4	27.7	1.3	0.9	1.1	0.9	1.0	0.3
C[unsat]	O[carbonyl]	13784	23.7	30.8	16.4	28.2	1.0	0.4	0.4	0.3	0.4	0.1
C[unsat]	O[ether]	1057	28.4	19.4	9.5	41.0	1.8	1.4	1.2	0.9	1.5	0.4
C[unsat]	O[hydroxyl]	2487	24.1	24.6	17.6	32.5	1.2	0.9	0.9	0.8	0.9	0.2
C[unsat]	O[conj]	2764	22.9	37.6	14.5	23.8	1.2	0.8	0.9	0.7	0.8	0.2
C[unsat]	S[delta+]	1127	20.7	40.0	19.6	18.4	1.3	1.2	1.5	1.2	1.2	0.3
C[unsat]	S[=C]	1099	23.6	41.4	15.6	18.8	0.6	1.3	1.5	1.1	1.2	0.2
Cl[C]	C[unsat]	1038	19.8	31.7	19.6	27.7	1.2	1.2	1.4	1.2	1.4	0.3
Cl[C]	Cl[C]	2555	21.8	37.3	16.4	22.1	2.5	0.8	1.0	0.7	0.8	0.3
Cl[C]	H[C]	9164	25.5	25.5	18.1	30.1	0.8	0.5	0.5	0.4	0.5	0.1
F[CF3]	C[unsat]	633	24.6	33.8	17.9	22.7	0.9	1.7	1.9	1.5	1.7	0.4
F[CF3]	F[CF3]	2670	22.1	36.8	17.9	21.2	1.9	0.8	0.9	0.7	0.8	0.3
F[CF3]	H[C]	4916	27.0	23.6	17.6	31.5	0.5	0.6	0.6	0.5	0.7	0.1
F[CnotCF3]	C[unsat]	1021	23.2	29.0	21.9	24.9	1.0	1.3	1.4	1.3	1.4	0.3
F[CnotCF3]	F[CnotCF3]	2014	24.7	33.6	18.7	20.7	2.3	1.0	1.1	0.9	0.9	0.3
F[CnotCF3]	H[C]	5519	26.6	27.9	17.2	27.8	0.5	0.6	0.6	0.5	0.6	0.1
H[C]	Br[C]	14969	25.6	21.4	14.5	37.7	0.8	0.4	0.3	0.3	0.4	0.1
H[C]	C[C6H5]	81986	23.9	21.2	14.4	39.7	0.8	0.1	0.1	0.1	0.2	0.0
H[C]	C[carbonyl]	13809	24.2	23.5	13.8	37.8	0.8	0.4	0.4	0.3	0.4	0.1
H[C]	C[methyl]	47903	28.2	20.7	12.9	37.4	0.9	0.2	0.2	0.2	0.2	0.0
H[C]	C[sat]	18422	28.3	20.0	12.5	38.4	0.7	0.3	0.3	0.2	0.4	0.1
H[C]	C[unsat]	225622	21.4	27.0	17.4	33.4	0.8	0.1	0.1	0.1	0.1	0.0
H[C]	Cl[C]	22373	25.4	25.4	17.8	30.6	0.8	0.3	0.3	0.3	0.3	0.1
H[C]	F[CF3]	7166	26.9	23.7	16.9	31.9	0.5	0.5	0.5	0.4	0.6	0.1
H[C]	F[CnotCF3]	8997	26.9	27.5	17.6	27.5	0.6	0.5	0.5	0.4	0.5	0.1
H[C]	H[C]	753000	27.3	22.4	13.0	36.0	1.2	0.1	0.0	0.0	0.1	0.0
H[C]	H[polar]	10938	25.3	16.6	14.2	42.9	1.0	0.4	0.4	0.3	0.5	0.1
H[C]	I[C]	2547	24.8	25.0	16.8	32.5	0.9	0.9	0.9	0.7	0.9	0.2
H[C]	N[acc]	42936	22.6	28.7	19.4	28.6	0.7	0.2	0.2	0.2	0.2	0.0
H[C]	N[planar]	3995	22.3	27.4	18.5	30.9	0.8	0.7	0.7	0.6	0.7	0.1
H[C]	O[=X]	63945	26.2	24.4	17.1	31.8	0.6	0.2	0.2	0.1	0.2	0.0
H[C]	O[anisole]	17060	22.7	28.1	17.2	31.0	0.9	0.3	0.3	0.3	0.4	0.1
H[C]	O[carbonyl]	160457	26.5	21.6	14.1	37.1	0.7	0.1	0.1	0.1	0.1	0.0
H[C]	O[ether]	20915	27.4	15.6	9.8	46.2	0.9	0.3	0.3	0.2	0.3	0.1
H[C]	O[hydroxyl]	25282	29.0	15.1	13.0	42.1	0.8	0.3	0.2	0.2	0.3	0.1
H[C]	O[conj]	23085	25.9	23.3	11.9	38.0	1.0	0.3	0.3	0.2	0.3	0.1
H[C]	P[3-coord]	838	28.5	29.7	14.9	26.6	0.2	1.6	1.6	1.2	1.5	0.2
H[C]	S[disulfide]	745	27.7	28.3	18.4	25.4	0.3	1.6	1.7	1.4	1.6	0.2
H[C]	S[delta+]	1967	23.9	29.9	19.6	26.0	0.6	1.0	1.0	0.9	1.0	0.2
H[C]	S[sulfoxide]	504	27.2	18.7	14.1	39.5	0.6	2.0	1.7	1.5	2.2	0.3
H[C]	S[=C]	7079	25.1	30.2	17.8	26.1	0.8	0.5	0.5	0.5	0.5	0.1
H[C]	S[thioether]	3844	25.9	24.8	16.2	32.6	0.5	0.7	0.7	0.6	0.8	0.1
H[polar]	C[C6H5]	707	20.8	31.3	12.7	33.7	1.6	1.5	1.7	1.3	1.8	0.5
H[polar]	C[unsat]	3537	18.3	36.6	17.1	27.1	0.9	0.7	0.8	0.6	0.7	0.2
H[polar]	H[C]	8040	26.6	20.4	15.0	37.3	0.8	0.5	0.4	0.4	0.5	0.1
H[polar]	N[acc]	7892	12.5	32.1	21.0	31.6	2.7	0.4	0.5	0.5	0.5	0.2
H[polar]	O[=X]	4923	19.2	30.6	17.5	31.6	1.1	0.6	0.7	0.5	0.7	0.2
H[polar]	O[anisole]	650	24.6	23.8	18.2	31.7	1.7	1.7	1.7	1.5	1.8	0.5
H[polar]	O[carbonyl]	23078	20.6	29.3	14.8	33.8	1.4	0.3	0.3	0.2	0.3	0.1
H[polar]	O[ether]	1793	25.7	13.9	7.8	51.2	1.4	1.0	0.8	0.6	1.2	0.3
H[polar]	O[hydroxyl]	7540	26.2	12.7	9.3	50.6	1.2	0.5	0.4	0.3	0.6	0.1
H[polar]	S[=C]	1781	9.8	59.0	13.3	16.2	1.9	0.7	1.2	0.8	0.9	0.3
I[C]	H[C]	504	26.8	22.4	17.7	32.7	0.4	2.0	1.9	1.7	2.1	0.3
N[acc]	C[methyl]	536	26.1	26.5	15.1	31.5	0.7	1.9	1.9	1.5	2.0	0.4
N[acc]	C[unsat]	4592	20.9	46.8	14.3	16.0	1.9	0.6	0.7	0.5	0.5	0.2
N[acc]	H[C]	36877	22.6	29.3	18.6	28.7	0.8	0.2	0.2	0.2	0.2	0.0
N[acc]	H[polar]	8092	12.2	31.3	21.7	32.1	2.7	0.4	0.5	0.5	0.5	0.2
N[acc]	N[acc]	522	13.2	46.7	15.1	20.1	4.8	1.5	2.2	1.6	1.8	0.9
N[planar]	C[C6H5]	1825	23.0	25.5	15.7	34.8	0.9	1.0	1.0	0.9	1.1	0.2
N[planar]	C[carbonyl]	1437	21.9	54.1	9.7	10.8	3.4	1.1	1.3	0.8	0.8	0.5
N[planar]	C[methyl]	1199	27.3	25.7	17.0	29.3	0.8	1.3	1.3	1.1	1.3	0.2
N[planar]	C[sat]	516	24.8	27.5	14.0	32.9	0.8	1.9	2.0	1.5	2.1	0.4
N[planar]	C[unsat]	13379	21.7	49.5	14.0	13.4	1.4	0.4	0.4	0.3	0.3	0.1
N[planar]	Cl[C]	780	22.6	34.0	17.6	25.3	0.6	1.5	1.7	1.4	1.6	0.3
N[planar]	H[C]	22652	22.7	26.3	17.3	32.7	0.9	0.3	0.3	0.3	0.3	0.1
N[planar]	H[polar]	810	18.1	27.7	16.4	33.7	4.1	1.4	1.6	1.3	1.7	0.7
N[planar]	N[acc]	1589	15.5	40.3	20.2	22.4	1.6	0.9	1.2	1.0	1.0	0.3
N[planar]	N[planar]	809	15.6	61.4	5.3	10.8	6.9	1.3	1.7	0.8	1.1	0.9
N[planar]	O[=X]	3826	18.3	35.8	18.0	26.5	1.4	0.6	0.8	0.6	0.7	0.2
N[planar]	O[carbonyl]	3505	17.4	31.1	16.1	34.6	0.9	0.6	0.8	0.6	0.8	0.2
O[=X]	C[unsat]	1232	22.8	25.2	19.4	32.2	0.3	1.2	1.2	1.1	1.3	0.2
O[=X]	H[C]	29015	27.0	24.2	17.1	31.1	0.6	0.3	0.3	0.2	0.3	0.0
O[=X]	H[polar]	4367	19.1	30.5	18.0	31.4	1.0	0.6	0.7	0.6	0.7	0.1
O[=X]	O[=X]	796	17.8	35.2	18.5	26.4	2.1	1.4	1.7	1.4	1.6	0.5
O[anisole]	C[unsat]	1256	17.8	48.0	12.6	20.5	1.1	1.1	1.4	0.9	1.1	0.3
O[anisole]	H[C]	16377	22.5	30.0	17.0	29.5	1.0	0.3	0.4	0.3	0.4	0.1
O[anisole]	H[polar]	810	23.5	24.2	18.1	33.0	1.2	1.5	1.5	1.4	1.7	0.4
O[carbonyl]	C[carbonyl]	1386	15.5	24.2	15.8	43.2	1.2	1.0	1.2	1.0	1.3	0.3
O[carbonyl]	C[methyl]	844	26.9	16.6	14.7	41.6	0.2	1.5	1.3	1.2	1.7	0.2
O[carbonyl]	C[unsat]	899	19.6	26.9	15.8	36.6	1.1	1.3	1.5	1.2	1.6	0.3
O[carbonyl]	H[C]	64014	26.8	22.0	13.7	36.7	0.7	0.2	0.2	0.1	0.2	0.0
O[carbonyl]	H[polar]	20777	20.2	29.9	14.6	34.0	1.3	0.3	0.3	0.2	0.3	0.1
O[ether]	H[C]	19739	28.1	14.9	9.1	46.7	1.2	0.3	0.3	0.2	0.4	0.1
O[ether]	H[polar]	1971	26.4	13.4	7.4	51.5	1.3	1.0	0.8	0.6	1.1	0.3
O[hydroxyl]	H[C]	14912	28.8	16.4	13.2	40.8	0.9	0.4	0.3	0.3	0.4	0.1
O[hydroxyl]	H[polar]	7362	26.0	11.7	9.3	52.0	1.0	0.5	0.4	0.3	0.6	0.1
O[conj]	C[C6H5]	702	27.6	21.2	11.7	38.5	1.0	1.7	1.5	1.2	1.8	0.4
O[conj]	C[carbonyl]	848	14.4	39.4	11.1	32.7	2.5	1.2	1.7	1.1	1.6	0.5
O[conj]	C[methyl]	1096	30.7	21.0	9.9	37.6	0.8	1.4	1.2	0.9	1.5	0.3
O[conj]	C[unsat]	2553	22.8	42.1	11.4	22.8	0.9	0.8	1.0	0.6	0.8	0.2
O[conj]	H[C]	31471	26.4	23.7	11.3	37.5	1.1	0.2	0.2	0.2	0.3	0.1
O[conj]	H[polar]	633	31.6	14.4	11.2	41.7	1.1	1.8	1.4	1.3	2.0	0.4
O[conj]	O[carbonyl]	1559	27.6	19.2	9.9	42.3	0.9	1.1	1.0	0.8	1.3	0.2
P[3-coord]	H[C]	1396	24.9	29.4	16.4	29.1	0.3	1.2	1.2	1.0	1.2	0.1
S[delta+]	H[C]	1262	23.0	30.2	19.5	26.7	0.6	1.2	1.3	1.1	1.2	0.2
S[sulfoxide]	H[C]	671	24.3	17.3	13.6	44.4	0.4	1.7	1.5	1.3	1.9	0.3
S[=C]	H[C]	1532	25.5	25.5	19.3	29.4	0.3	1.1	1.1	1.0	1.2	0.1
S[=C]	H[polar]	1308	6.4	67.4	10.6	14.0	1.7	0.7	1.3	0.8	1.0	0.4
S[thioether]	H[C]	2026	25.1	23.2	17.5	33.6	0.6	1.0	0.9	0.8	1.0	0.2
MAXIMUM			32.3	67.4	21.9	52.0	7.8
MINIMUM			6.4	9.8	5.3	10.8	0.2
MEAN			23.9	27.7	14.8	32.4	1.1
